# Supplementary material
Source: PubMed Central journal article supplement (PMC6532046)
Supplement: AEM.00123-19-s0001.pdf [file AEM.00123-19-s0001.pdf]

**Supplemental Information: The influence of plant species, tissue type and temperature on the capacity of Shigatoxigenic *Escherichia coli* to colonise, grow and internalise into plants.**

1 **Supplemental Methods**

2 **SM1 Primary Modelling**

3 Growth curves were fitted using the full Baranyi model described by Baranyi and Roberts (3),  
4 using DMFIT (2), as an Excel add on:

5 
$$y(t) = Y_0 + \mu A(t) - \ln \left\{ 1 + \frac{\exp(\mu A(t)) - 1}{\exp(Y_{max} - Y_0)} \right\} \quad (A)$$

6 
$$A(t) = t + \frac{1}{\mu} \ln[\exp(-\mu t) + \exp(-h_0) - \exp(-\mu t - h_0)] \quad (B)$$

7  $Y_0$  is the starting concentration,  $Y_{max}$  the maximum natural logarithm of bacterial counts,  $\mu$  the  
8 maximum growth rate and  $h_0$  the physiological state of the bacteria. (A) Cell concentration at  
9 time  $t > 0$ . (B) Gradual delay in time. Equation was taken from McKellar and Lu (12). The  
10 following inputs by default were used: mCurv = 10; nCurv = 0; lower bound = 0 and upper  
11 bound = 9999 (4). Root mean square error (RMSE) was calculated as proposed by McKellar  
12 and Lu (12) and the models ranked accordingly. The maximum growth rates  $\mu$ , standard error  
13 of the mean (SEM) were used directly from DMFIT output and plotted in Prism 7 for each  
14 temperature individually. Statistical analysis was conducted in Prism using two way ANOVA,  
15 Pearson correlation (16) and multiple comparison tests (9, 19) where necessary.

16 Due to the nature of the growth rates the formulas without lag phase have been chosen and  
17 fitted. The package uses both models for the log based 10 instead of natural logarithm.

18 Baranyi without lag : (C)

19 
$$\log_{10} Y \sim (\log_{10} Y_{max} - \log_{10} (1 + (10^{\log_{10} Y_{max} - \log_{10} Y_0} - 1) \exp(-\mu t)))$$

20

21 Buchanan without lag: (D)

$$\begin{aligned}
22 \quad \log_{10}Y &\sim \log_{10}Y_0 + \left( t \leq \left( (\log_{10}Y_{max} - \log_{10}Y_0) * \frac{\log_{10}}{\mu} \right) \right) \mu \frac{t}{\log_{10}} \\
23 \quad &+ \left( t > \left( (\log_{10}Y_{max} - \log_{10}Y_0) \frac{\log_{10}}{\mu} \right) \right) (\log_{10}Y_{max} - \log_{10}Y_0)
\end{aligned}$$

24 with  $\log_{10}Y_{max}$  the maximum bacterial count,  $\log_{10}Y_0$  the initial count,  $\mu$  the maximal growth rate  
25 and  $t$  the time (D) (5).

26 Models were run in pairs and either compared by (E) the corrected AIC (13) or the (F) root  
27 mean square error as proposed by McKellar and Lu (12):

$$28 \quad \Delta AIC = N * \ln \frac{SS2}{SS1} + 2\Delta DF \quad (E)$$

29 SS represents the sum of squares for both models and  $\Delta DF$  is the difference of degrees of  
30 freedom.

$$31 \quad RMSE = \sqrt{\frac{\sum(\hat{Y}-Y)^2}{df}} \quad (F)$$

32  $\hat{Y}$  is the fitted value,  $Y$  the sample value and  $df$  the degree of freedom. These criteria take into  
33 account the variability of parameters amongst models, which would otherwise impact a  
34 comparison by sum-of squares F test or adjusted  $R^2_{adj}$  (1, 6).

35 Models were tested for discrepancies of growth curve parameters if converted to the natural  
36 logarithm (ln) or logarithm with the base 10 ( $\log_{10}$ ) (Fig. S1) on the data set of *E. coli* JHI5025  
37 at 18 °C.

## 38 **SM2 Secondary modelling**

39 To determine temperature-dependent correlations, secondary modelling of the growth data  
40 with the linear approximation of the Ratkowsky model as used by McKellar and Lu (12) was  
41 attempted. However, a linear regression could not be fitted to the data in plant extracts and  
42 the number of temperature points ( $n = 3$ ) was insufficient for non-linear modelling with the full  
43 Ratkowsky model (14). This resulted in poor fittings after secondary modelling for all replicates  
44 and samples for bacterial growth curves for plant extracts. In contrast, the secondary  
45 modelling of the positive control in RDMG was successful and consistent throughout the data  
46 set with achieved good linear regression fittings with  $R^2$  (0.996 to 1).

## 47 **SM3 Apoplastic fluid collection**

48 Apoplast extraction followed the protocol of Husted and Schjoerring (10), which was  
49 developed for rapeseed (*Brassica napus*) and adjusted for spinach and lettuce to minimize  
50 cytoplasmic contamination (11). Leaves from plants grown in compost were harvested using  
51 a sterilised scalpel and immediately stored on ice. They were submerged under SDW in a  
52 vacuum chamber using a low vacuum pump (Divac 2.4L, Leybold, Switzerland) (L = low: 40 l  
53  $h^{-1}$ ; polytetrafluoroethylene diaphragm) and infiltrated by three to five cycles (maximum 2 min)  
54 of vacuum and release. Leaves were then gently dried on paper towels and rolled without  
55 breaking to fit a 20 ml syringe (BD Plastipak™, Becton, Dickinson and Company, USA) with  
56 the plunger removed. The syringe was placed into a 50 ml Falcon tube (Falcon, Thermo  
57 Scientific, USA) and was subject to centrifugation (Megafuge 16R, Thermo Scientific, USA) at  
58 200 rcf for spinach and 280 rcf for lettuce for 15 min. The resulting fluid, which contained the  
59 plant apoplast together with infiltrated water was collected and passed through a sterile 0.1  
60  $\mu m$  filter (Durapore, Merck, Germany). Extracts were stored at  $-20\text{ }^{\circ}C$  until further use.

61 Contamination of apoplast with cellular cytoplasm was evaluated as described previously (15,  
62 18). Fluid containing the apoplast was extracted using extraction buffer (50 mM potassium  
63 buffer, pH = 7.0; 0.05 %  $\beta$ -mercaptoethanol; 10 mM EDTA, pH = 8.0; protease inhibitor tablets  
64 (Sigma Aldrich, USA) instead of water. Infiltrated leaves were subject to centrifugation

65 (Megafuge 16R, Merck, Germany) at 200 rcf for spinach and 280 rcf for lettuce for 15 min and  
66 the extraction buffer containing the apoplast was used immediately. Leaf lysates were  
67 produced to allow relative quantification of cytoplasmic contamination, by grinding fresh leaves  
68 with liquid nitrogen and mixing 1:1 w/v with extraction buffer. The dispersion was then  
69 centrifuged (Megafuge 16R, Merck, Germany) at 5000 rcf for 15 min and supernatant was  
70 used immediately for enzymatic assay. Cytoplasmic malate dehydrogenase (MDH) was used  
71 for assessment since glucose-6-phosphate dehydrogenase (G6PDH) was undetectable, with  
72 no enzymatic activity in leaf lysates over five minutes. Malate dehydrogenase (MDH) was  
73 measured with 200  $\mu$ l MOPS buffer (200 mM MOPS; 50 mM sodium acetate and 10 mM  
74 EDTA); 50  $\mu$ l 0.5 mM NADH; 10  $\mu$ l plant extract; 540  $\mu$ l dH<sub>2</sub>O and 200  $\mu$ l 2 mM oxaloacetic  
75 acid at OD<sub>340</sub> for 5 min at RT. Buffer only was used as a negative control. Validation was  
76 carried out by spiking samples with a positive control containing 1  $\mu$ l purified MDH. Enzymatic  
77 assays were performed in triplicate. Cytoplasmic contamination, calculated as a ratio of  
78 enzyme activity (OD 340 nm min<sup>-1</sup>) between leaf lysates and apoplast, was estimated as 1.8  
79 % contamination in spinach and 5.0 % in lettuce.

#### 80 **SM4 Metabolite analysis and Correction factor for GC-MS data**

81 10 ml plant extract samples were lyophilised (116 l h<sup>-1</sup>) overnight and 40 mg extracted twice  
82 in 1 ml ethanol (80 %) by heating at 80 °C for 30 min, cooled on ice, and clarified by  
83 centrifugation (13000 RCF, 15 min) and then freeze dried under vacuum. Supernatants were  
84 pooled for further analysis and re-suspended in 1 ml molecular biology grade H<sub>2</sub>O. Glucose,  
85 fructose and sucrose were measured in a 1:100 v/v dilution in a Dionex chromatography  
86 machine fitted with a CarboPac® PA-100 column and 200 mM NaOH for 100 % of the eluent,  
87 flow = 1.0 ml min<sup>-1</sup> and column temperature at 30 °C for 15 min. Arabinose was measured with  
88 a CarboPac® PA-20 column. Buffers were run on a gradient profile: SMBG H<sub>2</sub>O; 200 mM  
89 NaOH and 1 M NaOAc at 0.4 ml min<sup>-1</sup> and column temperature at 30 °C, over 40 min. Standard  
90 curves for glucose, fructose, sucrose and arabinose concentrations were created and fitted  
91 using a linear regression, R<sup>2</sup> for 6 data points was: glucose = 0.999; fructose = 0.999; sucrose

92 = 0.999 and arabinose = 0.997. Concentrations were interpolated from the curve and  
93 normalised to the dry weight in mg.

94 Polar fractions were prepared for GC-MS analysis as described by Shepherd, et al. (17):  
95 glassware was pre-washed with dH<sub>2</sub>O, methanol / dH<sub>2</sub>O (3:1) and chloroform / methanol (2:1).  
96 Eicosane, tetracosane, triacontane, tetratriacontane, octatriacontane (each 2 mg ml<sup>-1</sup>),  
97 undecane, tridecane (both 2.7 µg ml<sup>-1</sup>), hexadecane (2.6 µg ml<sup>-1</sup>) were used as retention  
98 standards. 40 mg freeze dried plant extracts were suspended in 3 ml methanol with addition  
99 of 100 µl ribitol (as internal standard), 0.75 ml dH<sub>2</sub>O, 6 ml chloroform and water after each  
100 interval of mixing at 1500 rpm at 30 °C for 30 min. Samples were collected from centrifugation  
101 at 1200 rpm for 10 min and fractions separated into vials. The polar fraction was stored at -20  
102 °C until analysis. 250 µl polar fraction was evaporated for 2 h with heat and derivatisation  
103 conducted on day of analysis with addition of 20 mg methoxylamine hydrochloride (98 %) in 1  
104 ml anhydrous pyridine. 50 µl of retention standard mixture and *N*-Methyl-*N*-  
105 (trimethylsilyl)trifluoroacetamide (MSTFA) were added for derivatisation at 37 °C for 30 min.

106 Samples were analysed in a Quadrupole–mass spectrometry GC–MS system (Thermo  
107 Finnigan Trace DSQ, USA) described previously (17): split was set at 80:1, interface  
108 temperature was 250 °C, source temperature 200 °C and the full mass range over 35 – 900  
109 atomic mass units was analysed. Raw data files from the GC-MS were analysed in Xcalibur™  
110 v. 2.0.7 (Thermo Scientific, USA). Ion characteristics were used to identify metabolites.  
111 Selected ion chromatogram (SIC) was selected for each compound automatically, but was  
112 reviewed and baseline corrected manually as required. The two SIC of oxoproline, threonic  
113 acid, asparagine, tryptophan and maltose were added together, to account for oximated and  
114 unoximated derivatives. One SIC for aspartic acid was deleted and only the fully silyated  
115 derivative used in further analyses. Correction factors were applied as described below. The  
116 response ratio (RR) was calculated by comparing the SIC of each isolate against the SIC of  
117 the internal standard. Blanks were deducted from the results. ANOVA and Pearson correlation  
118 (16) was run in Prism 5 (Graphpad, USA) and GenStat 15 (VSN International, UK). A principal

119 components analysis (PCA) was calculated using GenStat 15 with an existing code (8). All  
120 samples were run in triplicate, except lettuce apoplast, for which there was only one sample.

121 Correction factors were calculated for glucose and fructose to account for the ratio of  
122 unoximated and oximated derivatives. This is a result of structural changes throughout the  
123 derivatisation process prior to measurement. Correction factor was calculated by the ratio of  
124 selected ion chromatogram / total ion chromatogram (TIC) of total sugar against SIC TIC<sup>-1</sup> of  
125 unoximated sugar and final multiplication with a system machine dependent factor (F<sub>System</sub>),  
126 either 1.361 (glucose) or 1.123 (fructose).

$$127 \quad \frac{\frac{SIC_{Total}}{TIC_{Total}}}{\frac{SIC_{Unoxi}}{TIC_{Unoxi}}} * F_{System} \quad (G)$$

128 where SIC is the selected ion chromatogram, TIC total ion chromatogram and F<sub>System</sub> a  
129 machine dependent factor for individual compounds.

130

### 131 **SM5 Conversion of absorption to viable counts**

132 Growth parameters used in mathematical modelling are usually required in log (cfu h<sup>-1</sup>), which  
133 requires conversion from optical density (OD) to viable counts. That was achieved by diluting  
134 a PBS-washed overnight culture of *E. coli* isolate MG1655 to a range of OD<sub>600</sub> nm and plating  
135 onto MacConkey agar. Best fit was achieved with a linear regression to 10 data points (R<sup>2</sup> =  
136 0.99), determined by the corrected AIC, which generated a slope for 4.5 \* 10<sup>8</sup> cfu ml<sup>-1</sup> (95 %  
137 Confidence interval (CI): 4.1 \* 10<sup>8</sup> to 4.8 \* 10<sup>8</sup>) with an intercept of -2.5 \* 10<sup>7</sup> ± 1.4 \* 10<sup>7</sup>. The  
138 measurements were validated from parallel absorption and viable counts for several time  
139 points, which generated similar results: slope fitting with 8 linear data points (R<sup>2</sup> = 0.958) was  
140 4.5 \* 10<sup>8</sup> cfu ml<sup>-1</sup> (CI: 3.6 \* 10<sup>8</sup> to 5.5 \* 10<sup>8</sup>) with an intercept of -1.2 \* 10<sup>7</sup> ± 2.0 \* 10<sup>7</sup>, over a  
141 range OD 600 nm 0.005 to 2.000. However, reciprocal multiplication of the OD<sub>600</sub> nm  
142 measurements required an adjustment to 4.2 \* 10<sup>8</sup> cfu ml<sup>-1</sup>, which when compared against the

143 viable counts showed no significant differences (two-way ANOVA ( $F(7, 70) = 0.81$ ;  $p = 0.58$ )).  
144 Therefore, the factor of  $4.2 \times 10^8$  cfu ml<sup>-1</sup> was used for all following growth experiments.

145

## 146 Supplemental Tables and Figures

147 **Supplemental Table 1** Maximum growth rates of *E. coli* in plant extracts of  
148 sprouts, lettuce and spinach

149 *E. coli* isolates were grown in a plate reader and the data converted to viable counts and  
150 fitted with the Baranyi model in DMFIT to obtain the maximum growth rates. Temp =  
151 Temperature in °C. Rates in log<sub>10</sub> (cfu h<sup>-1</sup>); n = number of data points used for curve fitting;  
152 R<sup>2</sup><sub>adj</sub> = Adjusted coefficient of determination.

153 **Supplemental Table 2** Response ratio of assigned polar metabolites in  
154 spinach and lettuce

155 Response ratio (RR) of metabolites determined against the internal standard ribitol. GC-MS  
156 ion characteristics used for compound identification was validated by external standards. A  
157 total of five plant species and tissues were examined: alfalfa, fenugreek, lettuce, spinach,  
158 apoplast (AP), leaf lysates (LL) and root lysates (RL). Limits for colour are > 50 (black); > 20  
159 (dark brown); > 10 (light brown); > 2 (red); > 1.5 (pink); > 1.0 (orange); > 0.8 (light orange); >  
160 0.6 (light blue); > 0.4 (light green); > 0.2 (green); > 0.1 (dark green) and < 0.1 (blue). (n = 3,  
161 except for LAP = 1). Individual metabolites that showed significant differences ( $p < 0.05$ )  
162 between tissues are underlined.

163 **Supplemental Figure 1** Manual correction of growth rate misfits in DMFIT.

164 Example of a correction with *E. coli* isolate JHI5039 grown in lettuce leaf lysate, 18 °C.

165 **A)** DMFIT could not fit a non-linear curve on data (n = 193) with a decrease in the  
166 stationary phase ( $R^2_{adj} = 0.001$ ). **B)** Data was cut off manually (n = 49) to achieve

167 better fits ( $R^2_{adj} = 0.996$ ). A complete list of fits including data points are in  
168 Supplemental Table 3.

## 169 **Supplemental Figure 2** Simplified polar metabolic pathways in plants

170 Interaction between major polar pathways (colour coded) in green leafy plants.  
171 Metabolism of carbohydrates degradation (green) is linked to amino acid degradation  
172 (dark blue and purple), which feed into the TCA cycle (red). The arrows pointing  
173 outside are entries into the non-polar fatty acid pathway. The glutamate group (orange)  
174 leads into the urea cycle. The light blue cycle described the acyl chain synthesis.  
175 Modified from the metabolomic pathway in *Solanum*, based on Dobson, et al. (7).

176

## 177 **References**

- 178 1. **Akaike, H.** 1974. A new look at the statistical model identification. *Ieee T Automat*  
179 *Contr* **19**:716-723.
- 180 2. **Baranyi, J., and T. A. Roberts.** 1994. A dynamic approach to predicting bacterial  
181 growth in food. *Int J Food Microbiol* **23**:277-94.
- 182 3. **Baranyi, J., and T. A. Roberts.** 1995. Mathematics of predictive food microbiology.  
183 *Int. J. Food Microbiol.* **26**:199-218.
- 184 4. **Baranyi, J., and T. A. Roberts.** 2000. Principles and application of predictive  
185 modelling of the effects of preservation factors on micro-organisms, p. 2024. *In* B.  
186 Lund, T. C. Baird-Parker, and G. W. Gould (ed.), *Microbiological safety and quality of*  
187 *food*, vol. 1. Asepn Publishers Inc, Maryland, USA.
- 188 5. **Baty, F., C. Ritz, S. Charles, M. Brutsche, J. P. Flandrois, and M. L. Delignette-**  
189 **Muller.** 2015. A toolbox for nonlinear regression in R: the package nlstools. *J Stat*  
190 *Softw* **66**:1-21.
- 191 6. **Burnham, K. P., and D. R. Anderson.** 2004. Multimodel inference. *Sociol Method*  
192 *Res* **33**:261-304.
- 193 7. **Dobson, G., T. Shepherd, R. Marshall, S. R. Verrall, S. Conner, D. W. Griffiths, J.**  
194 **W. McNicol, D. Stewart, and H. V. Davies.** 2007. Dordrecht.
- 195 8. **Dobson, G., T. Shepherd, S. R. Verrall, S. Conner, J. W. McNicol, G. Ramsay, L.**  
196 **V. T. Shepherd, H. V. Davies, and D. Stewart.** 2008. *Phytochemical diversity in*



- 197 tubers of potato cultivars and landraces using a GC-MS metabolomics approach. J  
198 Agri Food Chem **56**:10280-10291.
- 199 9. **Dunnett, C. W.** 1955. A multiple comparison procedure for comparing several  
200 treatments with a control. Journal of the American Statistical Association **50**:1096-  
201 1121.
- 202 10. **Husted, S., and J. K. Schjoerring.** 1995. Apoplastic pH and ammonium concentration  
203 in leaves of *Brassica napus* L. Plant Physiol **109**:1453-1460.
- 204 11. **Lohaus, G., K. Pennewiss, B. Sattelmacher, M. Hussmann, and K. Hermann**  
205 **Muehling.** 2001. Is the infiltration-centrifugation technique appropriate for the isolation  
206 of apoplastic fluid? A critical evaluation with different plant species. Physiologia  
207 Plantarum **111**:457-465.
- 208 12. **McKellar, R. C., and X. Lu.** 2004. Modeling microbial responses in food. CRC Press  
209 LLC, Florida, USA.
- 210 13. **Motulsky, H. J.** 2017, posting date. GraphPad Curve Fitting Guide. GraphPad  
211 Software. [Online.]
- 212 14. **Ratkowsky, D. A., R. K. Lowry, T. A. McMeekin, A. N. Stokes, and R. E. Chandler.**  
213 1983. Model for bacterial culture growth rate throughout the entire biokinetic  
214 temperature range. J Bacteriol **154**:1222-1226.
- 215 15. **Rico, A., and G. M. Preston.** 2008. *Pseudomonas syringae* pv. *tomato* DC3000 uses  
216 constitutive and apoplast-induced nutrient assimilation pathways to catabolize  
217 nutrients that are abundant in the tomato apoplast. Mol Plant Microbe Interact **21**:269-  
218 282.
- 219 16. **Rodgers, J. L., and W. A. Nicewander.** 1988. Thirteen ways to look at the correlation  
220 coefficient. The American Statistician **42**:59-66.
- 221 17. **Shepherd, T., G. Dobson, S. R. Verrall, S. Conner, D. W. Griffiths, J. W. McNicol,**  
222 **H. V. Davies, and D. Stewart.** 2007. Potato metabolomics by GC-MS: what are the  
223 limiting factors? Metabolomics **3**:475-488.
- 224 18. **Solomon, P. S., and R. P. Oliver.** 2001. The nitrogen content of the tomato leaf  
225 apoplast increases during infection by *Cladosporium fulvum*. Planta **213**:241-9.
- 226 19. **Tukey, J. W.** 1949. Comparing individual means in the analysis of variance. Biometrics  
227 **5**:99-114.

228

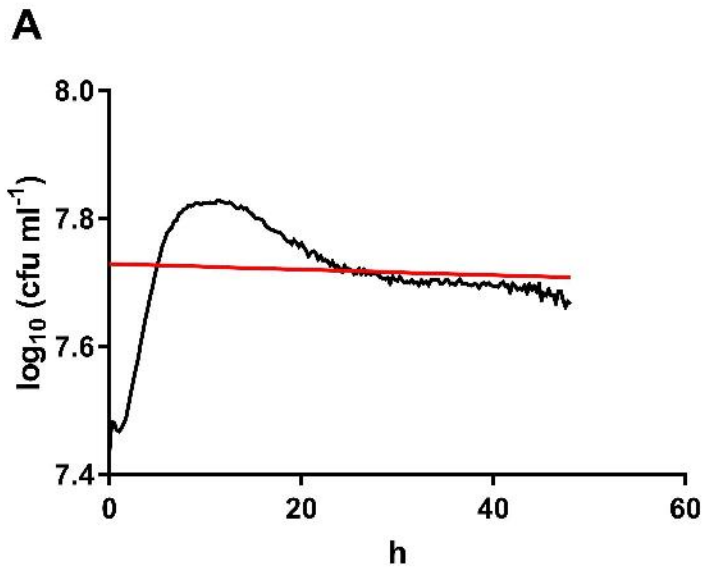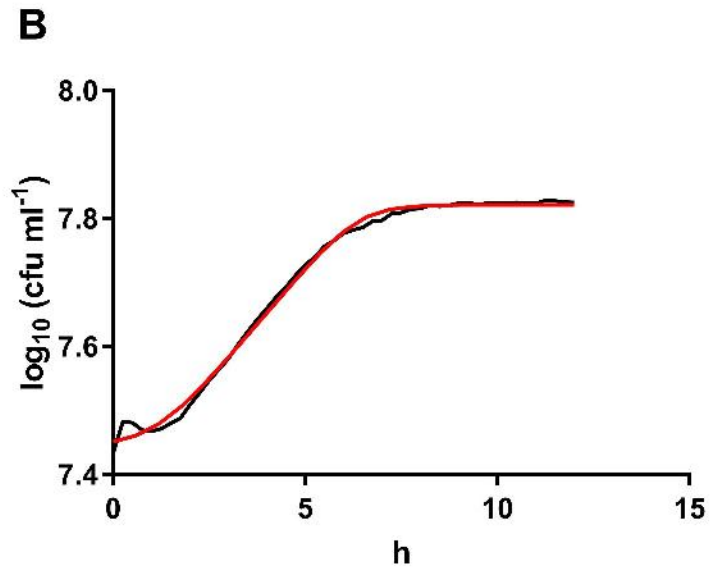

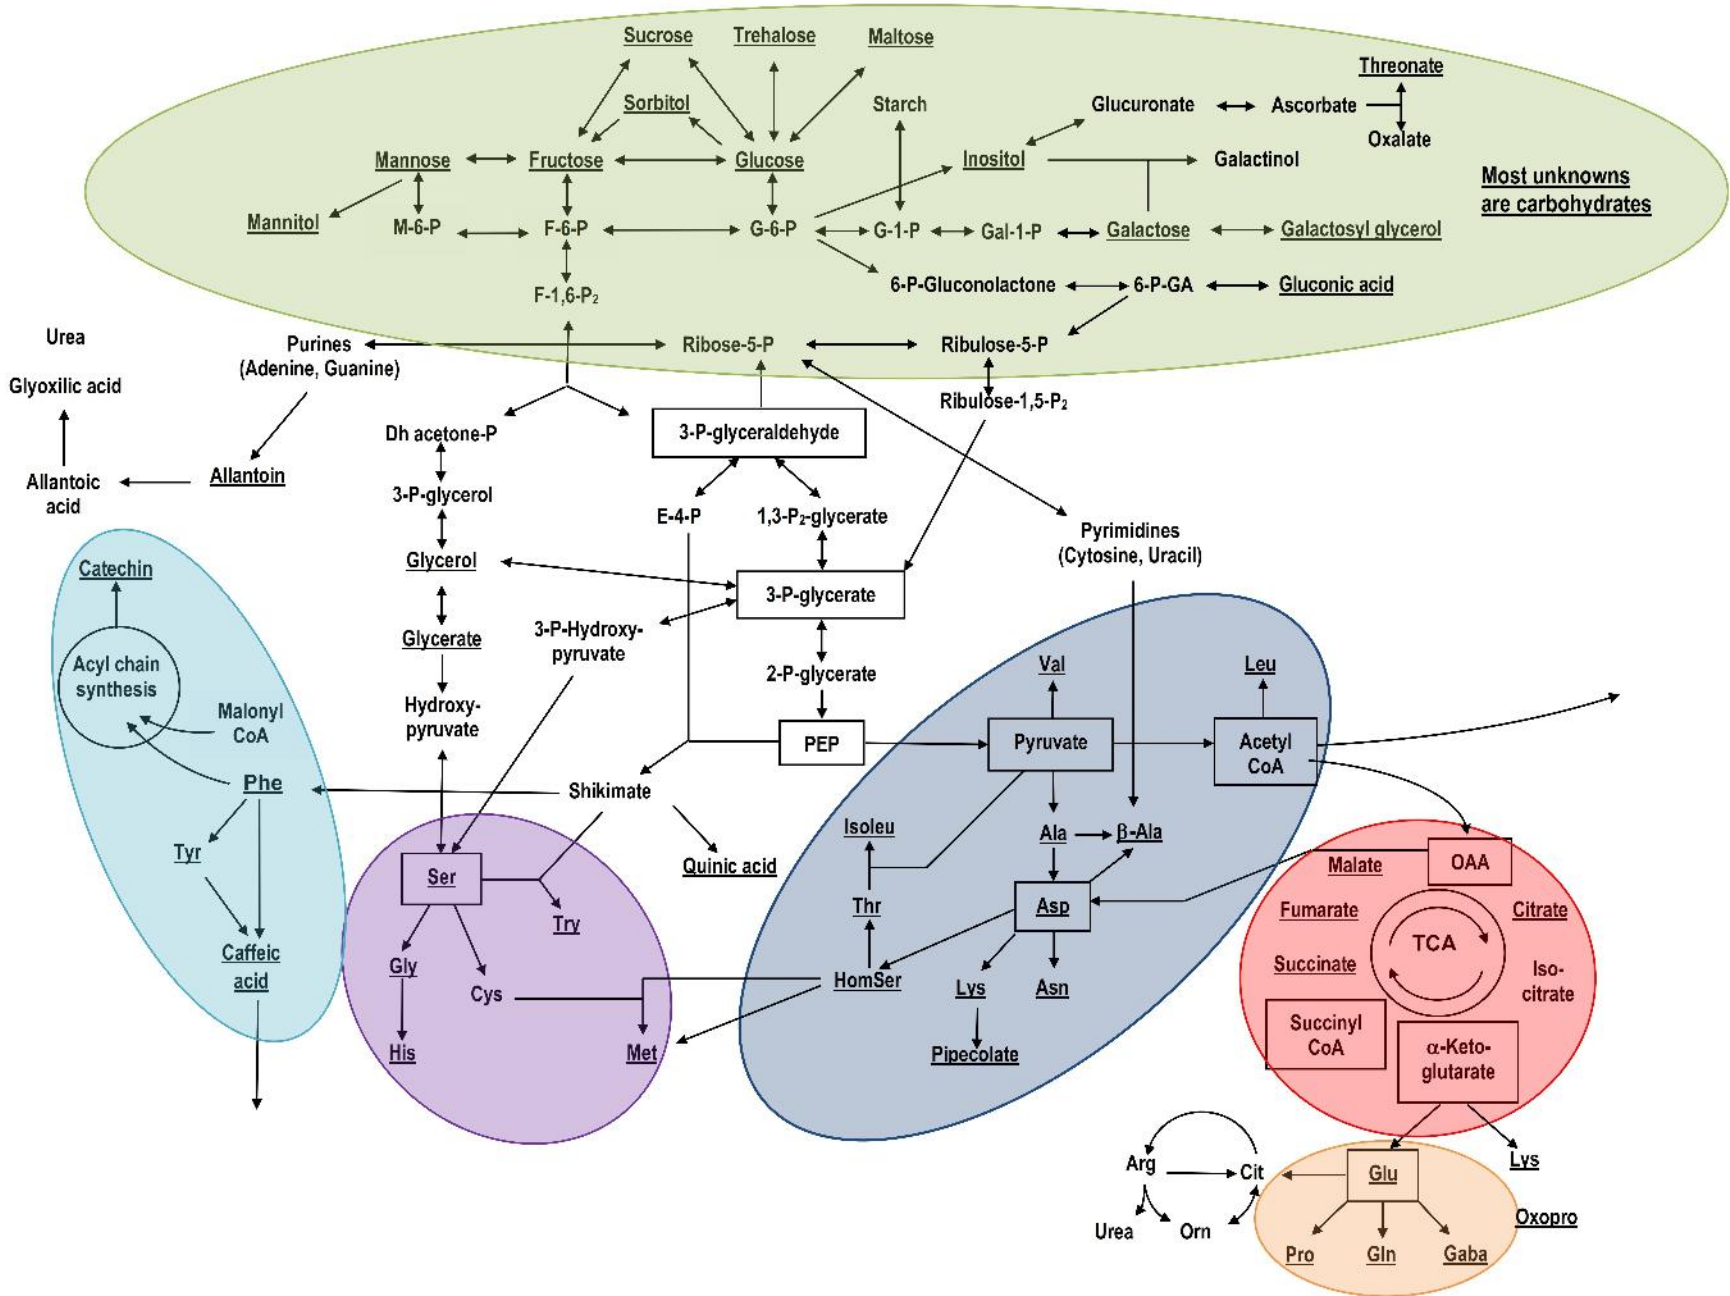

SFig. 2
